# Supplementary material for: Registry study on failure incidence in 1,127 revised hip implants with stem trunnion re-use after 10 years of follow-up: limited influence of an adapter sleeve
Source: PubMed Central journal article supplement (PMC6746291; doi:10.1080/17453674.2019.1618649), 2019-06-18
Supplement: IORT_A_1618649_SM3466.pdf [file IORT_A_1618649_SM3466.pdf]

## Supplementary data

Table 3. Description of the 44 failures

| Stem fixation     | Head size and material | Sex | BMI         | Reason for revision <sup>a</sup> | Age at revision | Reason for re-revision <sup>a</sup> | Age at re-revision | Stem type                              | Stem years in situ |
|-------------------|------------------------|-----|-------------|----------------------------------|-----------------|-------------------------------------|--------------------|----------------------------------------|--------------------|
| <b>No adapter</b> |                        |     |             |                                  |                 |                                     |                    |                                        |                    |
| Cemented          |                        |     |             |                                  |                 |                                     |                    |                                        |                    |
| 28 mm             |                        |     |             |                                  |                 |                                     |                    |                                        |                    |
|                   | CrCo                   | F   | Overweight  | Cup loosening                    | 79              | Dislocations                        | 79                 | SPECTRON Smith & Nephew (CrCo, 12/14)  | 6.0                |
|                   |                        | M   | Overweight  | Cup loosening                    | 80              | Global loosening                    | 81                 | SPECTRON Smith & Nephew (CrCo, 12/14)  | 12.3               |
|                   | SS                     | M   | Normal      | Dislocations                     | 76              | Periprosthetic fract.               | 76                 | LC Samo (CrCoMo, 12/14)                | 0.6                |
| 32 mm             |                        |     |             |                                  |                 |                                     |                    |                                        |                    |
|                   | CrCo                   | M   | Normal      | Periprosthetic fract.            | 76              | Cup loosening                       | 76                 | LC Samo (CrCoMo, 12/14)                | 6.0                |
|                   | Oxinium                | F   | Overweight  | Liner failure                    | 80              | Stem loosening                      | 81                 | BASIS Smith & Nephew (CrCo, 12/14)     | 11.6               |
| 36 mm             |                        |     |             |                                  |                 |                                     |                    |                                        |                    |
|                   | CrCo                   | F   | Unavailable | Unavailable                      | 73              | Cup loosening                       | 81                 | ALBI PTC Cremascoli (Ti6Al4V, 12/14)   | 14.3               |
| Cementless        |                        |     |             |                                  |                 |                                     |                    |                                        |                    |
| 28 mm             |                        |     |             |                                  |                 |                                     |                    |                                        |                    |
|                   | Ceramys                | F   | Unavailable | Dislocations                     | 79              | Dislocations                        | 79                 | CBC Mathys (Ti6Al4V, 12/14)            | 0.8                |
|                   | CrCo                   | F   | Obese       | Dislocations                     | 68              | Global loosening                    | 71                 | SL PLUS Endoplus (Ti6Al7Nb, 12/14)     | 7.7                |
|                   |                        | F   | Obese       | Primary instability              | 71              | Septic loosening                    | 71                 | RECTA Adler Ortho (Ti6Al4V, 12/14)     | 0.7                |
|                   |                        | F   | Overweight  | Cup loosening                    | 74              | Septic loosening                    | 74                 | SL PLUS MIA (Ti6Al7Nb, 12/14)          | 0.0                |
|                   |                        | F   | Overweight  | Dislocations                     | 41              | Stem loosening                      | 42                 | CORAIL DEPUY (Ti6Al4V, 12/14)          | 1.8                |
|                   |                        | F   | Overweight  | Pain                             | 73              | Periprosthetic fract.               | 77                 | HYDRA Adler Ortho (Ti6Al4V, 12/14)     | 5.5                |
|                   |                        | F   | Overweight  | Periprosthetic fract.            | 64              | Unavailable                         | 65                 | SL PLUS ENDOPLUS (Ti6Al7Nb, 12/14)     | 0.9                |
|                   |                        | F   | Unavailable | Dislocations                     | 81              | Periprosthetic fract.               | 81                 | CLS Sulzer (Ti6Al7Nb, 12/14)           | 9.8                |
|                   |                        | F   | Unavailable | Head failure                     | 52              | Global loosening                    | 62                 | STEM CREMASCOLI (Ti6Al4V, 12/14)       | 11.7               |
|                   |                        | M   | Normal      | Septic loosening                 | 74              | Stem loosening                      | 80                 | PPF Stratec (Ti6Al4V, 12/14)           | 6.6                |
|                   |                        | M   | Obese       | Cup loosening                    | 65              | Periprosthetic fract.               | 66                 | ABGII Howmedica (TMZF, V40)            | 3.5                |
|                   |                        | M   | Obese       | Pain                             | 70              | Stem loosening                      | 71                 | EHS Cremascoli (Ti6Al4V, 12/14)        | 6.1                |
|                   |                        | M   | Unavailable | Cup loosening                    | 71              | Septic loosening                    | 75                 | CONUS Sulzer (Ti6Al7Nb, 12/14)         | 7.6                |
|                   |                        | M   | Unavailable | Dislocations                     | 68              | Unavailable                         | 76                 | CLS Sulzer (Ti6Al7Nb, 12/14)           | 10.2               |
|                   |                        | M   | Unavailable | Unavailable                      | 50              | Septic loosening                    | 53                 | CONUS Sulzer (Ti6Al7Nb, 12/14)         | 10.6               |
|                   | Forte                  | F   | Normal      | Cup loosening                    | 64              | Periprosthetic fract.               | 64                 | AD Samo (CrCoMo, 12/14)                | 3.4                |
|                   |                        | F   | Normal      | Dislocations                     | 82              | Dislocations                        | 82                 | CLS Sulzer (Ti6Al7Nb, 12/14)           | 9.2                |
|                   |                        | F   | Normal      | Head failure                     | 72              | Periprosthetic fract.               | 78                 | SPS Symbios (Ti6Al4V, 12/14)           | 10.6               |
|                   |                        | F   | Obese       | Pain                             | 52              | Septic loosening                    | 53                 | CONUS Zimmer (Ti6Al7Nb, 12/14)         | 1.7                |
|                   |                        | F   | Unavailable | Unavailable                      | 65              | Cup loosening                       | 68                 | ANCA FIT Cremascoli (Ti6Al4V, 12/14)   | 4.0                |
|                   | Oxinium                | M   | Overweight  | Pain                             | 70              | Dislocations                        | 71                 | SL PLUS Endoplus (Ti6Al7Nb, 12/14)     | 3.0                |
| 32 mm             |                        |     |             |                                  |                 |                                     |                    |                                        |                    |
|                   | CrCo                   | F   | Unavailable | Dislocations                     | 57              | Global loosening                    | 60                 | PERFECTA MicroPort (Ti6Al4V, 12/14)    | 3.5                |
|                   |                        | M   | Overweight  | Head failure                     | 63              | Global loosening                    | 70                 | PROFEMUR Z Cremascoli (Ti6Al4V, 12/14) | 8.8                |
|                   | Forte                  | F   | Overweight  | Unavailable                      | 74              | Septic loosening                    | 74                 | MINIMAX Medacta (Ti6Al7Nb, 12/14)      | 1.2                |
| 36 mm             |                        |     |             |                                  |                 |                                     |                    |                                        |                    |
|                   | CrCo                   | F   | Unavailable | Cup loosening                    | 68              | Global loosening                    | 73                 | CBC Mathys (Ti6Al4V, 12/14)            | 9.2                |
|                   |                        | M   | Unavailable | Unavailable                      | 79              | Septic loosening                    | 80                 | SL PLUS MIA (Ti6Al7Nb, 12/14)          | 0.4                |
|                   | Delta                  | M   | Obese       | Cup loosening                    | 60              | Septic loosening                    | 60                 | CORAE Adler Ortho (Ti6Al4V, 12/14)     | 1.2                |
|                   |                        | M   | Overweight  | Cup loosening                    | 61              | Pain                                | 65                 | CONELock SHORT Biomet (Ti6Al4V, 12/14) | 7.0                |
|                   |                        | M   | Overweight  | Pain                             | 65              | Stem loosening                      | 68                 | C2 Lima (Ti6Al4V, 12/14)               | 8.2                |
|                   |                        | M   | Overweight  | Primary instability              | 54              | Cup loosening                       | 54                 | SAM-FIT Lima (Ti6Al4V, 12/14)          | 0.7                |
|                   | Forte                  | F   | Overweight  | Dislocations                     | 70              | Stem loosening                      | 71                 | CFP Link (Ti, 12/14)                   | 1.9                |
|                   |                        | F   | Unavailable | Pain                             | 62              | Stem loosening                      | 68                 | CBC Mathys (Ti6Al4V, 12/14)            | 6.3                |
|                   |                        | M   | Overweight  | Unavailable                      | 64              | Stem loosening                      | 64                 | QUADRA-S Medacta (Ti6Al7Nb, 12/14)     | 0.5                |
| <b>Adapter</b>    |                        |     |             |                                  |                 |                                     |                    |                                        |                    |
| Cementless        |                        |     |             |                                  |                 |                                     |                    |                                        |                    |
| 28 mm             |                        |     |             |                                  |                 |                                     |                    |                                        |                    |
|                   | Delta                  | F   | Overweight  | Unavailable                      | 66              | Unavailable                         | 67                 | CONUS Sulzer (Ti6Al7Nb, 12/14)         | 16.0               |
|                   | SS                     | F   | Normal      | Cup loosening                    | 67              | Stem loosening                      | 67                 | STEM Cremascoli (Ti6Al4V, 12/14)       | 13.8               |
| 36 mm             |                        |     |             |                                  |                 |                                     |                    |                                        |                    |
|                   | Delta                  | F   | Overweight  | Cup loosening                    | 62              | Stem loosening                      | 68                 | CFP Link (Ti, 12/14)                   | 11.9               |
|                   |                        | M   | Overweight  | Liner failure                    | 67              | Neck failure                        | 73                 | RECTA Adler Ortho (Ti6Al4V, 12/14)     | 9.6                |
|                   |                        | M   | Unavailable | Liner failure                    | 46              | Neck failure                        | 50                 | APTA Adler Ortho (Ti6Al4V, 12/14)      | 8.5                |

<sup>a</sup> Loosening is aseptic unless otherwise specified. Pain indicates pain without loosening.

SS = stainless steel
